# Supplementary material for: Protocol for implementation of the ‘AusPROM’ recommendations for elective surgery patients: a mixed-methods cohort study
Source: HighWire-hosted journal article supplement (doi:10.1136/bmjopen-2021-049937), 2021-09-01
Supplement: bmjopen-2021-049937supp001_data_supplement.pdf [file bmjopen-2021-049937supp001_data_supplement.pdf]

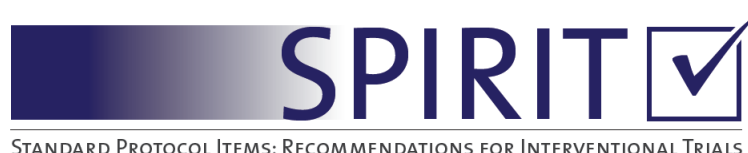

## Protocol for implementation of the “AusPROM” Recommendations for elective surgery patients: A mixed-methods cohort study.

**SPIRIT 2013 Checklist: Recommended items to address in a clinical trial protocol and related documents\***  
*The SPIRIT-PRO Elaboration and Extension questions have been added to this version of the SPIRIT checklist*

| Section/item                      | Item No                   | Description                                                                                                                                                                                                                                                                              | Reporting of the item                                            |
|-----------------------------------|---------------------------|------------------------------------------------------------------------------------------------------------------------------------------------------------------------------------------------------------------------------------------------------------------------------------------|------------------------------------------------------------------|
| <b>Administrative information</b> |                           |                                                                                                                                                                                                                                                                                          |                                                                  |
| Title                             | 1                         | Descriptive title identifying the study design, population, interventions, and, if applicable, trial acronym                                                                                                                                                                             | Reported in the manuscript                                       |
| Trial registration                | 2a                        | Trial identifier and registry name. If not yet registered, name of intended registry                                                                                                                                                                                                     | Reported in the manuscript                                       |
|                                   | 2b                        | All items from the World Health Organization Trial Registration Data Set                                                                                                                                                                                                                 |                                                                  |
| Protocol version                  | 3                         | Date and version identifier                                                                                                                                                                                                                                                              | Version 1 of the protocol submitted January 2021                 |
| Funding                           | 4                         | Sources and types of financial, material, and other support                                                                                                                                                                                                                              | Reported in the manuscript                                       |
| Roles and responsibilities        | 5a                        | Names, affiliations, and roles of protocol contributors                                                                                                                                                                                                                                  | Reported in the manuscript                                       |
|                                   | SPIRIT-5a-PRO Elaboration | Specify the individual(s) responsible for the PRO content of the trial protocol.                                                                                                                                                                                                         | All authors are responsible for the PROM content of the protocol |
|                                   | 5b                        | Name and contact information for the trial sponsor                                                                                                                                                                                                                                       | Trial sponsor is Healthscope                                     |
|                                   | 5c                        | Role of study sponsor and funders, if any, in study design; collection, management, analysis, and interpretation of data; writing of the report; and the decision to submit the report for publication, including whether they will have ultimate authority over any of these activities | Reported in the manuscript                                       |
|                                   | 5d                        | Composition, roles, and responsibilities of the coordinating centre, steering committee, endpoint adjudication committee, data management team, and other individuals or groups overseeing the trial, if applicable (see Item 21a for data monitoring committee)                         | N/A                                                              |

| Section/item                                       | Item No                   | Description                                                                                                                                                                                                                                                     | Reporting of the item                                                                                               |
|----------------------------------------------------|---------------------------|-----------------------------------------------------------------------------------------------------------------------------------------------------------------------------------------------------------------------------------------------------------------|---------------------------------------------------------------------------------------------------------------------|
| Introduction                                       |                           |                                                                                                                                                                                                                                                                 |                                                                                                                     |
| Background and rationale                           | 6a                        | Description of research question and justification for undertaking the trial, including summary of relevant studies (published and unpublished) examining benefits and harms for each intervention                                                              | Reported in the manuscript                                                                                          |
|                                                    | SPIRIT-6a-PRO Elaboration | Describe the PRO specific research question and rationale for PRO assessment, and summarize PRO findings in relevant studies.                                                                                                                                   | Reported in the manuscript                                                                                          |
|                                                    | 6b                        | Explanation for choice of comparators                                                                                                                                                                                                                           | Reported in the manuscript                                                                                          |
| Objectives                                         | 7                         | Specific objectives or hypotheses                                                                                                                                                                                                                               | Reported in the manuscript                                                                                          |
|                                                    | SPIRIT-7-PRO Elaboration  | State specific PRO objectives or hypotheses (including relevant PRO concepts/domains).                                                                                                                                                                          | Reported in the manuscript                                                                                          |
| Trial design                                       | 8                         | Description of trial design including type of trial (eg, parallel group, crossover, factorial, single group), allocation ratio, and framework (eg, superiority, equivalence, noninferiority, exploratory)                                                       | Reported in the manuscript                                                                                          |
| Methods: Participants, interventions, and outcomes |                           |                                                                                                                                                                                                                                                                 |                                                                                                                     |
| Study setting                                      | 9                         | Description of study settings (eg, community clinic, academic hospital) and list of countries where data will be collected. Reference to where list of study sites can be obtained                                                                              | Reported in the manuscript                                                                                          |
| Eligibility criteria                               | 10                        | Inclusion and exclusion criteria for participants. If applicable, eligibility criteria for study centres and individuals who will perform the interventions (eg, surgeons, psychotherapists)                                                                    | Reported in the manuscript                                                                                          |
|                                                    | SPIRIT-10-PRO Extension   | Specify any PRO-specific eligibility criteria (e.g. language/reading requirements or prerandomization completion of PRO). If PROs will not be collected in the entire study sample, provide a rationale and describe the method for obtaining the PRO subsample | Reported in the manuscript                                                                                          |
| Interventions                                      | 11a                       | Interventions for each group with sufficient detail to allow replication, including how and when they will be administered                                                                                                                                      | This is an observational study of usual care with a PROM introduced to capture the patient perception of usual care |
|                                                    | 11b                       | Criteria for discontinuing or modifying allocated interventions for a given trial participant (eg, drug dose change in response to harms, participant request, or improving/worsening disease)                                                                  | N/A                                                                                                                 |

| Section/item         | Item No                   | Description                                                                                                                                                                                                                                                                                                                                                                    | Reporting of the item      |
|----------------------|---------------------------|--------------------------------------------------------------------------------------------------------------------------------------------------------------------------------------------------------------------------------------------------------------------------------------------------------------------------------------------------------------------------------|----------------------------|
|                      | 11c                       | Strategies to improve adherence to intervention protocols, and any procedures for monitoring adherence (eg, drug tablet return, laboratory tests)                                                                                                                                                                                                                              | Reported in the manuscript |
|                      | 11d                       | Relevant concomitant care and interventions that are permitted or prohibited during the trial                                                                                                                                                                                                                                                                                  | N/A                        |
| Outcomes             | 12                        | Primary, secondary, and other outcomes, including the specific measurement variable (eg, systolic blood pressure), analysis metric (eg, change from baseline, final value, time to event), method of aggregation (eg, median, proportion), and time point for each outcome. Explanation of the clinical relevance of chosen efficacy and harm outcomes is strongly recommended | Reported in the manuscript |
|                      | SPIRIT-12-PRO Extension   | Specify the PRO concepts/domains used to evaluate the intervention (e.g. overall HRQOL, specific domain, specific symptom) and, for each one, the analysis metric (e.g. change from baseline, final value, time to event) and the principal time point or period of interest.                                                                                                  | Reported in the manuscript |
| Participant timeline | 13                        | Time schedule of enrolment, interventions (including any run-ins and washouts), assessments, and visits for participants. A schematic diagram is highly recommended (see Figure)                                                                                                                                                                                               | Reported in the manuscript |
|                      | SPIRIT-13-PRO Extension   | Include a schedule of PRO assessments, providing a rationale for the time points, and justifying if the initial assessment is not pre randomization. Specify: time windows; whether PRO collection is prior to clinical assessments; and if using multiple questionnaires, whether order of administration will be standardized.                                               | Reported in the manuscript |
| Sample size          | 14                        | Estimated number of participants needed to achieve study objectives and how it was determined, including clinical and statistical assumptions supporting any sample size calculations                                                                                                                                                                                          | Reported in the manuscript |
| Sample size          | SPIRIT-14-PRO Elaboration | Where a PRO is the primary endpoint, state the required sample size (and how it was determined) and recruitment target (accounting for expected loss to follow-up). If sample size is not established based on PRO endpoint, then discuss the power of the principal PRO analyses.                                                                                             | Reported in the manuscript |

| Section/item                                                        | Item No | Description                                                                                                                                                                                                                                                                                                                                                                                                  | Reporting of the item             |
|---------------------------------------------------------------------|---------|--------------------------------------------------------------------------------------------------------------------------------------------------------------------------------------------------------------------------------------------------------------------------------------------------------------------------------------------------------------------------------------------------------------|-----------------------------------|
| Recruitment                                                         | 15      | Strategies for achieving adequate participant enrolment to reach target sample size                                                                                                                                                                                                                                                                                                                          | Reported in the manuscript        |
| <b>Methods: Assignment of interventions (for controlled trials)</b> |         |                                                                                                                                                                                                                                                                                                                                                                                                              |                                   |
| Allocation:                                                         |         |                                                                                                                                                                                                                                                                                                                                                                                                              |                                   |
| Sequence generation                                                 | 16a     | Method of generating the allocation sequence (eg, computer-generated random numbers), and list of any factors for stratification. To reduce predictability of a random sequence, details of any planned restriction (eg, blocking) should be provided in a separate document that is unavailable to those who enrol participants or assign interventions                                                     | N/A – observational survey design |
| Allocation concealment mechanism                                    | 16b     | Mechanism of implementing the allocation sequence (eg, central telephone; sequentially numbered, opaque, sealed envelopes), describing any steps to conceal the sequence until interventions are assigned                                                                                                                                                                                                    | N/A – observational survey design |
| Implementation                                                      | 16c     | Who will generate the allocation sequence, who will enrol participants, and who will assign participants to interventions                                                                                                                                                                                                                                                                                    | N/A – observational survey design |
| Blinding (masking)                                                  | 17a     | Who will be blinded after assignment to interventions (eg, trial participants, care providers, outcome assessors, data analysts), and how                                                                                                                                                                                                                                                                    | N/A – observational survey design |
|                                                                     | 17b     | If blinded, circumstances under which unblinding is permissible, and procedure for revealing a participant's allocated intervention during the trial                                                                                                                                                                                                                                                         | N/A – observational survey design |
| <b>Methods: Data collection, management, and analysis</b>           |         |                                                                                                                                                                                                                                                                                                                                                                                                              |                                   |
| Data collection methods                                             | 18a     | Plans for assessment and collection of outcome, baseline, and other trial data, including any related processes to promote data quality (eg, duplicate measurements, training of assessors) and a description of study instruments (eg, questionnaires, laboratory tests) along with their reliability and validity, if known. Reference to where data collection forms can be found, if not in the protocol | Reported in the manuscript        |

| Section/item        | Item No                         | Description                                                                                                                                                                                                                                                                                                                                                                                                                                                                                                           | Reporting of the item      |
|---------------------|---------------------------------|-----------------------------------------------------------------------------------------------------------------------------------------------------------------------------------------------------------------------------------------------------------------------------------------------------------------------------------------------------------------------------------------------------------------------------------------------------------------------------------------------------------------------|----------------------------|
|                     | SPIRIT-18a(i)- PRO Extension    | Justify the PRO instrument to be used, and describe domains, number of items, recall period, instrument scaling/scoring (e.g. range and direction of scores indicating a good/poor outcome). Evidence of PRO instrument measurement properties, interpretation guidelines, and patient acceptability/burden should be provided or cited if available, ideally in the population of interest. State whether the measure will be used in accordance with any user manual and specify and justify deviations if planned. | Reported in the manuscript |
|                     | SPIRIT-18a(ii)- PRO Extension   | Include a data collection plan outlining the permitted mode(s) of administration (e.g. paper, telephone, electronic, other) and setting (e.g. clinic, home, other).                                                                                                                                                                                                                                                                                                                                                   | Reported in the manuscript |
|                     | SPIRIT-18a(iii)- PRO Extension  | Specify whether more than one language version will be used, and state whether translated versions have been developed using currently recommended methods.                                                                                                                                                                                                                                                                                                                                                           | Reported in the manuscript |
|                     | SPIRIT-18a(iv)- PRO Extension   | Where the trial context requires someone other than the trial participant to answer on their behalf (a proxy reported outcome), state and justify this. Provide/cite evidence of the validity of proxy assessment if available.                                                                                                                                                                                                                                                                                       | N/A                        |
|                     | 18b                             | Plans to promote participant retention and complete follow-up, including list of any outcome data to be collected for participants who discontinue or deviate from intervention protocols                                                                                                                                                                                                                                                                                                                             | Reported in the manuscript |
|                     | SPIRIT-18b(i)- PRO Extension    | Specify PRO data collection and management strategies for minimising avoidable missing data.                                                                                                                                                                                                                                                                                                                                                                                                                          | Reported in the manuscript |
|                     | SPIRIT-18b(ii)- PRO Elaboration | Describe the process of PRO assessment for participants who discontinue or deviate from their assigned intervention protocol                                                                                                                                                                                                                                                                                                                                                                                          | N/A                        |
| Data management     | 19                              | Plans for data entry, coding, security, and storage, including any related processes to promote data quality (eg, double data entry; range checks for data values). Reference to where details of data management procedures can be found, if not in the protocol                                                                                                                                                                                                                                                     | Reported in the manuscript |
| Statistical methods | 20a                             | Statistical methods for analysing primary and secondary outcomes. Reference to where other details of the statistical analysis plan can be found, if not in the protocol                                                                                                                                                                                                                                                                                                                                              | Reported in the manuscript |

| Section/item | Item No                    | Description                                                                                                                                                                     | Reporting of the item      |
|--------------|----------------------------|---------------------------------------------------------------------------------------------------------------------------------------------------------------------------------|----------------------------|
|              | SPIRIT-20a-PRO Elaboration | State PRO analysis methods including any plans for addressing multiplicity/type 1 ( $\alpha$ ) error.                                                                           | Reported in the manuscript |
|              | 20b                        | Methods for any additional analyses (eg, subgroup and adjusted analyses)                                                                                                        | Reported in the manuscript |
|              | 20c                        | Definition of analysis population relating to protocol non-adherence (eg, as randomised analysis), and any statistical methods to handle missing data (eg, multiple imputation) | Reported in the manuscript |
|              | SPIRIT-20c-PRO Elaboration | State how missing data will be described and outline the methods for handling missing items or entire assessments (e.g. approach to imputation and sensitivity analyses).       | Reported in the manuscript |

**Methods: Monitoring**

|                 |                         |                                                                                                                                                                                                                                                                                                                                       |                                                                                                                                                             |
|-----------------|-------------------------|---------------------------------------------------------------------------------------------------------------------------------------------------------------------------------------------------------------------------------------------------------------------------------------------------------------------------------------|-------------------------------------------------------------------------------------------------------------------------------------------------------------|
| Data monitoring | 21a                     | Composition of data monitoring committee (DMC); summary of its role and reporting structure; statement of whether it is independent from the sponsor and competing interests; and reference to where further details about its charter can be found, if not in the protocol. Alternatively, an explanation of why a DMC is not needed | A DMD is not required in this study as this is an observational study of usual care with a PROM introduced to capture the patient perception of usual care. |
|                 | 21b                     | Description of any interim analyses and stopping guidelines, including who will have access to these interim results and make the final decision to terminate the trial                                                                                                                                                               | N/A                                                                                                                                                         |
| Harms           | 22                      | Plans for collecting, assessing, reporting, and managing solicited and spontaneously reported adverse events and other unintended effects of trial interventions or trial conduct                                                                                                                                                     | N/A                                                                                                                                                         |
|                 | SPIRIT-22-PRO Extension | State whether or not PRO data will be monitored during the study to inform the clinical care of individual trial participants and, if so, how this will be managed in a standardized way. Describe how this process will be explained to participants, e.g. in the participant information sheet and consent form.                    | PROM data will not be monitored during the study, only at the conclusion of the study.                                                                      |
| Auditing        | 23                      | Frequency and procedures for auditing trial conduct, if any, and whether the process will be independent from investigators and the sponsor                                                                                                                                                                                           | The trial conduct will not be audited                                                                                                                       |

**Ethics and dissemination**

| Section/item                  | Item No | Description                                                                                                                                                                                                                                                                         | Reporting of the item                                                                                                                                    |
|-------------------------------|---------|-------------------------------------------------------------------------------------------------------------------------------------------------------------------------------------------------------------------------------------------------------------------------------------|----------------------------------------------------------------------------------------------------------------------------------------------------------|
| Research ethics approval      | 24      | Plans for seeking research ethics committee/institutional review board (REC/IRB) approval                                                                                                                                                                                           | Ethics approval has been obtained from La Trobe University Human Research Ethics Committee (HEC20479)                                                    |
| Protocol amendments           | 25      | Plans for communicating important protocol modifications (eg, changes to eligibility criteria, outcomes, analyses) to relevant parties (eg, investigators, REC/IRBs, trial participants, trial registries, journals, regulators)                                                    | Important protocol modifications will be communicated via the ANZCTR                                                                                     |
| Consent or assent             | 26a     | Who will obtain informed consent or assent from potential trial participants or authorised surrogates, and how (see Item 32)                                                                                                                                                        | Reported in the manuscript                                                                                                                               |
|                               | 26b     | Additional consent provisions for collection and use of participant data and biological specimens in ancillary studies, if applicable                                                                                                                                               | N/A                                                                                                                                                      |
| Confidentiality               | 27      | How personal information about potential and enrolled participants will be collected, shared, and maintained in order to protect confidentiality before, during, and after the trial                                                                                                | Reported in the manuscript                                                                                                                               |
| Declaration of interests      | 28      | Financial and other competing interests for principal investigators for the overall trial and each study site                                                                                                                                                                       | Reported in the manuscript                                                                                                                               |
| Access to data                | 29      | Statement of who will have access to the final trial dataset, and disclosure of contractual agreements that limit such access for investigators                                                                                                                                     | Reported in the manuscript                                                                                                                               |
| Ancillary and post-trial care | 30      | Provisions, if any, for ancillary and post-trial care, and for compensation to those who suffer harm from trial participation                                                                                                                                                       | N/A                                                                                                                                                      |
| Dissemination policy          | 31a     | Plans for investigators and sponsor to communicate trial results to participants, healthcare professionals, the public, and other relevant groups (eg, via publication, reporting in results databases, or other data sharing arrangements), including any publication restrictions | Reported in the manuscript                                                                                                                               |
|                               | 31b     | Authorship eligibility guidelines and any intended use of professional writers                                                                                                                                                                                                      | Reported in the manuscript under Author Statement. There is no intent to use professional writers                                                        |
|                               | 31c     | Plans, if any, for granting public access to the full protocol, participant-level dataset, and statistical code                                                                                                                                                                     | Plans to share participant-level dataset is reported in the manuscript. The full protocol is shared via the ANZCTR. Statistical code will not be shared. |

| Section/item               | Item No         | Description                                                                                                                                                                                    | Reporting of the item             |
|----------------------------|-----------------|------------------------------------------------------------------------------------------------------------------------------------------------------------------------------------------------|-----------------------------------|
| Appendices                 |                 |                                                                                                                                                                                                |                                   |
| Informed consent materials | 32              | Model consent form and other related documentation given to participants and authorised surrogates                                                                                             | Available upon reasonable request |
| Biological specimens       | 33              | Plans for collection, laboratory evaluation, and storage of biological specimens for genetic or molecular analysis in the current trial and for future use in ancillary studies, if applicable | N/A                               |
| Questionnaires             | PRO Elaboration |                                                                                                                                                                                                | Available upon reasonable request |

\*It is strongly recommended that this checklist be read in conjunction with the SPIRIT 2013 Explanation & Elaboration for important clarification on the items. Amendments to the protocol should be tracked and dated. The SPIRIT checklist is copyrighted by the SPIRIT Group under the Creative Commons "[Attribution-NonCommercial-NoDerivs 3.0 Unported](#)" license.
